# Supplementary material
Source: PubMed Central journal article supplement (PMC7736250)
Supplement: NIHMS1629122-supplement-Supp_info.pdf [file NIHMS1629122-supplement-Supp_info.pdf]

**Table S1.** Adiponectin: SNPs for genetic risk score calculation

| <b>Literature SNP <sup>1</sup></b> | <b>Used SNP</b> | <b>R<sup>2</sup></b> | <b>Used SNP:<br/>Effect allele (EA)</b> | <b>EA freq</b> | <b>Used SNP:<br/>Other allele</b> | <b>β-coefficient for<br/>literature SNP</b> |
|------------------------------------|-----------------|----------------------|-----------------------------------------|----------------|-----------------------------------|---------------------------------------------|
| rs3774261                          | rs3774261       | 1.00                 | A                                       | 0.407          | G                                 | 0.354                                       |
| rs3821799                          | rs3821799       | 1.00                 | C                                       | 0.541          | T                                 | 0.352                                       |
| rs17300539                         | rs822387        | 0.83                 | C                                       | 0.0857         | T                                 | 0.330                                       |

**Table S2.** Alkaline phosphatase (ALP): SNPs for genetic risk score calculation\*

| Literature SNP <sup>2</sup> | Used SNP   | R <sup>2</sup> | Used SNP: Effect allele (EA) | EA freq | Used SNP: Other allele | $\beta$ -coefficient for literature SNP |
|-----------------------------|------------|----------------|------------------------------|---------|------------------------|-----------------------------------------|
| rs16856332                  | rs10199694 | 1.00           | A                            | 0.0357  | G                      | 3.9                                     |
| rs174601                    | rs174601   | 1.00           | C                            | 0.642   | T                      | 1.7                                     |
| rs579459                    | rs651007   | 1.00           | T                            | 0.229   | C                      | 8.8                                     |
| rs2954021                   | rs2980875  | 0.78           | G                            | 0.446   | A                      | 1.4                                     |
| rs7267979                   | rs6083776  | 0.59           | G                            | 0.516   | A                      | 1.5                                     |

\*The following literature SNPs were not analyzed since there were no proxies available: rs10819937, rs1883415, rs1976403, rs2236653, rs281377, rs314253, rs6984305, rs7186908, rs7923609.

**Table S3.** Birthweight: SNPs for genetic risk score calculation\*

| Literature SNP <sup>3</sup> | Used SNP   | R <sup>2</sup> | Used SNP: Effect allele (EA) | EA freq | Used SNP: Other allele | β-coefficient for literature SNP |
|-----------------------------|------------|----------------|------------------------------|---------|------------------------|----------------------------------|
| rs1351394                   | rs1042725  | 0.84           | T                            | 0.512   | C                      | 0.023                            |
| rs35261542                  | rs9368222  | 1.00           | C                            | 0.739   | A                      | 0.044                            |
| rs7076938                   | rs7076938  | 1.00           | T                            | 0.719   | C                      | 0.036                            |
| rs700059                    | rs2488597  | 0.80           | G                            | 0.156   | A                      | 0.033                            |
| rs12823128                  | rs7309939  | 0.77           | T                            | 0.519   | C                      | 0.021                            |
| rs10830963                  | rs10830963 | 1.00           | G                            | 0.276   | C                      | 0.023                            |

\*The following literature SNPs were not analyzed since there were no proxies available: rs13322435, rs1171920, rs925098, rs854037, rs1374204, rs138715366, rs1101081, rs28510415, rs113086489, rs61862780, rs6537307, rs3753639, rs62240962, rs62466330, rs13266210, rs1415701, rs7575873, rs28530618, rs6016377, rs10935733, rs72851023, rs11765649, rs2473248, rs7402982, rs11096402, rs7729301, rs144843919, rs72480273, rs1819436, rs74233809, rs12543725, rs1011939, rs12942207, rs798489, rs7847628, rs2421016, rs6040076, rs2324499, rs7964361, rs12906125, rs6959887, rs7742369, rs9379832, rs2242116, rs2229742, rs2854355, rs134594, rs11055034, rs10402712, rs61154119, rs2150052, rs61830764, rs6989280, rs139975827.

**Table S4.** Body mass index (BMI): SNPs for genetic risk score calculation\*

| Literature SNP <sup>4</sup> | Used SNP   | R <sup>2</sup> | Used SNP: Effect allele (EA) | EA freq | Used SNP: Other allele | $\beta$ -coefficient for literature SNP |
|-----------------------------|------------|----------------|------------------------------|---------|------------------------|-----------------------------------------|
| rs1558902                   | rs1421085  | 1.00           | C                            | 0.417   | T                      | 0.079                                   |
| rs12566985                  | rs7553158  | 1.00           | G                            | 0.436   | A                      | 0.027                                   |
| rs3888190                   | rs4788099  | 1.00           | G                            | 0.383   | A                      | 0.028                                   |
| rs17001654                  | rs17001561 | 1.00           | A                            | 0.157   | G                      | 0.032                                   |
| rs12705981                  | rs12705973 | 1.00           | G                            | 0.447   | A                      | 0.021                                   |
| rs2075650                   | rs2075650  | 1.00           | A                            | 0.856   | G                      | 0.031                                   |
| rs2246012                   | rs2246012  | 1.00           | C                            | 0.159   | T                      | 0.022                                   |
| rs1808579                   | rs2236707  | 0.97           | C                            | 0.577   | T                      | 0.022                                   |
| rs9880211                   | rs9844666  | 0.95           | A                            | 0.242   | G                      | 0.023                                   |
| rs11030104                  | rs10767664 | 0.91           | A                            | 0.784   | T                      | 0.038                                   |
| rs12016871                  | rs7988412  | 0.78           | T                            | 0.180   | C                      | 0.031                                   |
| rs16951275                  | rs6494696  | 0.72           | G                            | 0.669   | C                      | 0.030                                   |
| rs2287019                   | rs10423928 | 0.67           | T                            | 0.789   | A                      | 0.032                                   |
| rs3817334                   | rs11570094 | 0.66           | A                            | 0.309   | C                      | 0.027                                   |
| rs2112347                   | rs6453133  | 0.57           | A                            | 0.709   | G                      | 0.030                                   |

\*The following literature SNPs were not analyzed since there were no proxies available: rs11672550, rs13078960, rs12450239, rs17024393, rs1928295, rs11917972, rs7550169, rs29941, rs9856151, rs1830074, rs11247009, rs268073, rs2579103, rs10938353, rs6062788, rs12885454, rs1464321, rs4566392, rs38313, rs2650492, rs4984406, rs1979755, rs657452, rs9867325.

**Table S5.** Coronary artery disease (CAD): SNPs for genetic risk score calculation\*

| Literature SNP <sup>5,6</sup> | Used SNP   | R <sup>2</sup> | Used SNP: Effect allele (EA) | EA freq | Used SNP: Other allele | OR for literature SNP |
|-------------------------------|------------|----------------|------------------------------|---------|------------------------|-----------------------|
| rs11206510                    | rs11206510 | 1.00           | T                            | 0.816   | C                      | 1.08                  |
| rs11556924                    | rs11556924 | 1.00           | C                            | 0.632   | T                      | 1.08                  |
| rs17514846                    | rs17514846 | 1.00           | A                            | 0.461   | C                      | 1.05                  |
| rs2519093                     | rs651007   | 0.96           | T                            | 0.229   | C                      | 1.08                  |
| rs2681472                     | rs11105354 | 1.00           | G                            | 0.171   | A                      | 1.08                  |
| rs2891168                     | rs2891168  | 1.00           | G                            | 0.519   | A                      | 1.21                  |
| rs2954029                     | rs10808546 | 1.00           | C                            | 0.575   | T                      | 1.04                  |
| rs3184504                     | rs3184504  | 1.00           | T                            | 0.489   | C                      | 1.07                  |
| rs7528419                     | rs7528419  | 1.00           | A                            | 0.774   | G                      | 1.12                  |
| rs2244608                     | rs2244608  | 1.00           | G                            | 0.340   | A                      | 1.06                  |

\*The following literature SNPs were not analyzed since there were no proxies available: rs10139550, rs10840293, rs11191416, rs11838776, rs12202017, rs1412444, rs16986953, rs17087335, rs17678683, rs180803, rs1870634, rs2107595, rs2128739, rs216172, rs2487928, rs28451064, rs3918226, rs4252185, rs4420638, rs4468572, rs4593108, rs515135, rs55730499, rs56062135, rs56289821, rs56336142, rs6544713, rs663129, rs6689306, rs67180937, rs6725887, rs7212798, rs72689147, rs7568458, rs8042271, rs9349379, rs9818870, rs9970807, rs11810571, rs7623687, rs142695226, rs433903, rs10857147, rs11723436, rs35879803, rs1351525, rs11170820, rs7500448, rs8108632.

**Table S6.** Total cholesterol: SNPs for genetic risk score calculation\*

| Literature SNP <sup>7,8</sup> | Used SNP  | R <sup>2</sup> | Used SNP: Effect allele (EA) | EA freq | Used SNP: Other allele | β-coefficient for literature SNP |
|-------------------------------|-----------|----------------|------------------------------|---------|------------------------|----------------------------------|
| rs10401969                    | rs3794991 | 1.00           | T                            | 0.0824  | C                      | -0.137                           |
| rs12027135                    | rs873308  | 1.00           | G                            | 0.460   | A                      | -0.027                           |
| rs1260326                     | rs1260326 | 1.00           | T                            | 0.428   | C                      | 0.051                            |
| rs12916                       | rs12916   | 1.00           | C                            | 0.397   | T                      | 0.068                            |
| rs1367117                     | rs1367117 | 1.00           | A                            | 0.318   | G                      | 0.100                            |
| rs1800961                     | rs1800961 | 1.00           | T                            | 0.0284  | C                      | -0.106                           |
| rs1883025                     | rs1883025 | 1.00           | T                            | 0.256   | C                      | -0.067                           |
| rs1961456                     | rs1961456 | 1.00           | G                            | 0.278   | A                      | 0.032                            |
| rs2000999                     | rs2000999 | 1.00           | A                            | 0.210   | G                      | 0.062                            |
| rs2479409                     | rs2479409 | 1.00           | G                            | 0.345   | A                      | 0.054                            |
| rs3764261                     | rs3764261 | 1.00           | A                            | 0.317   | C                      | 0.050                            |
| rs4299376                     | rs4299376 | 1.00           | G                            | 0.320   | T                      | 0.079                            |
| rs629301                      | rs646776  | 1.00           | C                            | 0.227   | T                      | -0.134                           |
| rs651007                      | rs651007  | 1.00           | T                            | 0.229   | C                      | 0.069                            |
| rs6511720                     | rs6511720 | 1.00           | T                            | 0.117   | G                      | -0.185                           |
| rs174550                      | rs1535    | 0.97           | A                            | 0.674   | G                      | -0.048                           |
| rs3850634                     | rs1748197 | 0.97           | A                            | 0.322   | G                      | -0.075                           |
| rs2290159                     | rs9817675 | 0.80           | T                            | 0.189   | C                      | -0.037                           |
| rs964184                      | rs2075290 | 0.63           | T                            | 0.921   | C                      | -0.121                           |
| rs1532085                     | rs4775041 | 0.57           | C                            | 0.282   | G                      | 0.054                            |

\*The following literature SNPs were not analyzed since there were no proxies available: rs10832963, rs11065987, rs11136341, rs11220463, rs1169288, rs117087731, rs12983728, rs1564348, rs1800562, rs2072183, rs2081687, rs2126259, rs2255141, rs2277862, rs2285942, rs2807834, rs2814982, rs2902940, rs2954022, rs3757354, rs4297946, rs4420638, rs492602, rs514230, rs581080, rs6759321, rs6882076, rs7206971, rs7239867, rs7515577, rs7941030, rs9488822.

**Table S7.** C-reactive protein (CRP): SNPs for genetic risk score calculation\*

| Literature SNP <sup>9</sup> | Used SNP   | R <sup>2</sup> | Used SNP: Effect allele (EA) | EA freq | Used SNP: Other allele | $\beta$ -coefficient for literature SNP |
|-----------------------------|------------|----------------|------------------------------|---------|------------------------|-----------------------------------------|
| rs12239046                  | rs12239046 | 1.00           | C                            | 0.621   | T                      | 0.048                                   |
| rs1260326                   | rs1260326  | 1.00           | T                            | 0.428   | C                      | 0.089                                   |
| rs1800961                   | rs1800961  | 1.00           | C                            | 0.972   | T                      | 0.120                                   |
| rs2794520                   | rs1205     | 1.00           | C                            | 0.666   | T                      | 0.193                                   |
| rs4129267                   | rs4129267  | 1.00           | C                            | 0.581   | T                      | 0.094                                   |
| rs4420065                   | rs1805096  | 1.00           | G                            | 0.619   | A                      | 0.111                                   |
| rs1183910                   | rs2244608  | 0.96           | A                            | 0.660   | G                      | 0.152                                   |
| rs13233571                  | rs13232120 | 0.93           | A                            | 0.880   | T                      | 0.054                                   |
| rs6734238                   | rs4251961  | 0.61           | C                            | 0.382   | T                      | 0.047                                   |

\*The following literature SNPs were not analyzed since there were no proxies available: rs10521222, rs10745954, rs12037222, rs2836878, rs340029, rs4420638, rs4903031, rs9987289.

**Table S8.** Diastolic blood pressure (DBP): SNPs for genetic risk score calculation\*

| Literature SNP <sup>10</sup> | Used SNP   | R <sup>2</sup> | Used SNP: Effect allele (EA) | EA freq | Used SNP: Other allele | $\beta$ -coefficient for literature SNP |
|------------------------------|------------|----------------|------------------------------|---------|------------------------|-----------------------------------------|
| rs11105354                   | rs11105354 | 1.00           | A                            | 0.829   | G                      | 0.459                                   |
| rs11556924                   | rs11556924 | 1.00           | T                            | 0.368   | C                      | -0.214                                  |
| rs13306560                   | rs13306560 | 1.00           | T                            | 0.0497  | C                      | 0.290                                   |
| rs1450271                    | rs7944706  | 0.76           | A                            | 0.455   | G                      | 0.199                                   |
| rs1620668                    | rs1620668  | 1.00           | A                            | 0.841   | G                      | -0.285                                  |
| rs16823124                   | rs16823124 | 1.00           | A                            | 0.309   | G                      | 0.265                                   |
| rs17037390                   | rs17037390 | 1.00           | A                            | 0.147   | G                      | -0.499                                  |
| rs17367504                   | rs17367504 | 1.00           | A                            | 0.855   | G                      | 0.390                                   |
| rs2493134                    | rs2493134  | 1.00           | T                            | 0.572   | C                      | -0.275                                  |
| rs3184504                    | rs3184504  | 1.00           | T                            | 0.489   | C                      | 0.362                                   |
| rs4494250                    | rs10786172 | 0.93           | A                            | 0.652   | G                      | 0.150                                   |
| rs4746172                    | rs3793921  | 1.00           | T                            | 0.747   | C                      | 0.076                                   |
| rs4846049                    | rs4846049  | 1.00           | T                            | 0.322   | G                      | -0.196                                  |
| rs592373                     | rs592373   | 1.00           | A                            | 0.640   | G                      | 0.282                                   |
| rs6271                       | rs6271     | 1.00           | T                            | 0.0668  | C                      | -0.465                                  |
| rs936226                     | rs7085     | 0.85           | T                            | 0.292   | C                      | -0.363                                  |

\*The following literature SNPs were not analyzed since there were no proxies available: rs10077885, rs10850411, rs10943605, rs10995311, rs10995311, rs11014166, rs110419, rs11128722, rs1126464, rs1126464, rs1156725, rs11953630, rs12243859, rs12521868, rs12627651, rs12656497, rs12940887, rs12958173, rs13082711, rs13107325, rs13139571, rs1327235, rs1361831, rs1371182, rs1378942, rs1401454, rs1458038, rs167479, rs17030613, rs17080093, rs17428471, rs17638167, rs1799945, rs1975487, rs2187668, rs2272007, rs2291435, rs2384550, rs2521501, rs2586886, rs2891546, rs2898290, rs2932538, rs2969070, rs35444, rs3735533, rs3752728, rs381815, rs4245739, rs4247374, rs4590817, rs4660293, rs6026748, rs6095241, rs633185, rs6442101, rs6495122, rs6779380, rs6825911, rs687621, rs689134, rs6969780, rs7076398, rs7103648, rs711737, rs7213273, rs7302981, rs7302981, rs740746, rs7515635, rs751984, rs76452347, rs772178, rs805303, rs8068318, rs8068318, rs880315, rs891511, rs900145, rs918466, rs926552, rs932764, rs943037, rs9687065.

**Table S9.** Estimated glomerular filtration rate from serum creatinine (eGFR<sub>Cr</sub>): SNPs for genetic risk score calculation\*

| Literature SNP <sup>11</sup> | Used SNP   | R <sup>2</sup> | Used SNP: Effect allele (EA) | EA freq | Used SNP: Other allele | β-coefficient for literature SNP |
|------------------------------|------------|----------------|------------------------------|---------|------------------------|----------------------------------|
| rs8091180                    | rs8091180  | 1.00           | A                            | 0.560   | G                      | -0.006                           |
| rs12136063                   | rs111142   | 0.89           | A                            | 0.278   | G                      | 0.0045                           |
| rs4667594                    | rs10490132 | 0.91           | C                            | 0.510   | A                      | -0.0044                          |
| rs1260326                    | rs1260326  | 1.00           | T                            | 0.428   | C                      | 0.0068                           |
| rs6546838                    | rs6546838  | 1.00           | A                            | 0.761   | G                      | -0.0093                          |
| rs9472135                    | rs9369425  | 0.77           | A                            | 0.705   | G                      | -0.008                           |
| rs316009                     | rs316009   | 1.00           | T                            | 0.0989  | C                      | 0.0131                           |
| rs7805747                    | rs10480300 | 1.00           | T                            | 0.288   | C                      | -0.013                           |
| rs3758086                    | rs3758086  | 1.00           | A                            | 0.405   | G                      | -0.0071                          |

\*The following literature SNPs were not analyzed since there were no proxies available: rs3850625, rs2712184, rs9682041, rs10513801, rs10994860, rs163160, rs164748, rs2802729, rs6795744, rs228611, rs7759001, rs10277115, rs3750082, rs6459680, rs4014195, rs10491967, rs7956634, rs1106766, rs11666497, rs6088580, rs17216707, rs1800615, rs267734, rs807601, rs7422339, rs2861422, rs17319721, rs11959928, rs6420094, rs848490, rs4744712, rs1044261, rs963837, rs10774021, rs716877, rs476633, rs2467853, rs491567, rs1394125, rs13329952, rs2453580, rs9916302, rs11657044, rs12460876.

**Table S10.** Fibrinogen: SNPs for genetic risk score calculation\*

| Literature SNP <sup>12</sup> | Used SNP   | R <sup>2</sup> | Used SNP: Effect allele (EA) | EA freq | Used SNP: Other allele | $\beta$ -coefficient for literature SNP |
|------------------------------|------------|----------------|------------------------------|---------|------------------------|-----------------------------------------|
| rs3138493                    | rs1571536  | 0.91           | T                            | 0.486   | C                      | -0.005                                  |
| rs73058052                   | rs2304204  | 0.56           | T                            | 0.732   | C                      | 0.007                                   |
| rs10157379                   | rs12239046 | 0.93           | C                            | 0.621   | T                      | -0.010                                  |
| rs59104589                   | rs15129    | 0.52           | T                            | 0.802   | C                      | -0.008                                  |
| rs1800961                    | rs1800961  | 1.00           | T                            | 0.0284  | C                      | -0.017                                  |

\*The following literature SNPs were not analyzed since there were no proxies available: rs7588285, rs62246343, rs1976714, rs2710804, rs7012814, rs2250644, rs2420915, rs7934094, rs7310615, rs56702977, rs1035560, rs7224737, rs1892534, rs61812598, rs1558643, rs6734238, rs715, rs9840812, rs59950280, rs7439150, rs2057655, rs71520386, rs11780978, rs7916868, rs11230201, rs2731439, rs367677, rs12913259, rs11859517, rs9808651, rs75347843.

**Table S11.** Fasting glucose: SNPs for genetic risk score calculation\*

| Literature SNP <sup>1</sup> | Used SNP   | R <sup>2</sup> | Used SNP: Effect allele (EA) | EA freq | Used SNP: Other allele | $\beta$ -coefficient for literature SNP |
|-----------------------------|------------|----------------|------------------------------|---------|------------------------|-----------------------------------------|
| rs10830963                  | rs10830963 | 1.00           | G                            | 0.276   | C                      | 0.067                                   |
| rs4607517                   | rs1799884  | 1.00           | T                            | 0.174   | C                      | 0.062                                   |
| rs11920090                  | rs10513685 | 0.93           | G                            | 0.859   | A                      | 0.020                                   |
| rs7944584                   | rs11039149 | 0.84           | A                            | 0.720   | G                      | 0.021                                   |
| rs560887                    | rs569805   | 0.73           | T                            | 0.656   | A                      | 0.075                                   |

\*The following literature SNPs were not analyzed since there were no proxies available: rs10885122, rs11071657, rs11605924, rs11708067, rs13266634, rs2191349, rs340874, rs7034200.

**Table S12.** Gamma-glutamyl transferase (GTT): SNPs for genetic risk score calculation\*

| Literature SNP <sup>2</sup> | Used SNP   | R <sup>2</sup> | Used SNP: Effect allele (EA) | EA freq | Used SNP: Other allele | β-coefficient for literature SNP |
|-----------------------------|------------|----------------|------------------------------|---------|------------------------|----------------------------------|
| rs10513686                  | rs11711437 | 1.00           | C                            | 0.857   | G                      | 4.9                              |
| rs1260326                   | rs1260326  | 1.00           | C                            | 0.572   | T                      | 3.2                              |
| rs17145750                  | rs17145750 | 1.00           | T                            | 0.155   | C                      | 4.5                              |
| rs12145922                  | rs786918   | 0.82           | A                            | 0.421   | G                      | 2.8                              |
| rs2739330                   | rs1006771  | 0.80           | T                            | 0.657   | G                      | 3.7                              |
| rs7310409                   | rs2244608  | 0.62           | G                            | 0.340   | A                      | 6.8                              |

\*The following literature SNPs were not analyzed since there were no proxies available: rs1076540, rs10908458, rs12968116, rs13030978, rs1335645, rs1497406, rs2073398, rs2140773, rs339969, rs4074793, rs4503880, rs4547811, rs4581712, rs516246, rs6888304, rs754466, rs8038465, rs9296736, rs944002, rs9913711.

**Table S13.** High-density lipoprotein (HDL): SNPs for genetic risk score calculation\*

| Literature SNP <sup>7,8</sup> | Used SNP   | R <sup>2</sup> | Used SNP: Effect allele (EA) | EA freq | Used SNP: Other allele | β-coefficient for literature SNP |
|-------------------------------|------------|----------------|------------------------------|---------|------------------------|----------------------------------|
| rs1121980                     | rs1121980  | 1.00           | A                            | 0.436   | G                      | -0.020                           |
| rs12678919                    | rs10503669 | 1.00           | A                            | 0.0996  | C                      | 0.155                            |
| rs13326165                    | rs13326165 | 1.00           | A                            | 0.191   | G                      | 0.029                            |
| rs17145738                    | rs13232120 | 1.00           | T                            | 0.120   | A                      | 0.041                            |
| rs174601                      | rs174601   | 1.00           | T                            | 0.358   | C                      | -0.039                           |
| rs1800961                     | rs1800961  | 1.00           | T                            | 0.0283  | C                      | -0.127                           |
| rs1883025                     | rs1883025  | 1.00           | T                            | 0.256   | C                      | -0.070                           |
| rs3136441                     | rs2070850  | 1.00           | T                            | 0.126   | C                      | 0.054                            |
| rs3764261                     | rs3764261  | 1.00           | A                            | 0.317   | C                      | 0.241                            |
| rs4846914                     | rs4846914  | 1.00           | G                            | 0.409   | A                      | -0.048                           |
| rs6065906                     | rs6073952  | 1.00           | A                            | 0.190   | G                      | -0.059                           |
| rs6805251                     | rs6782799  | 1.00           | T                            | 0.397   | C                      | 0.020                            |
| rs881844                      | rs881844   | 1.00           | G                            | 0.655   | C                      | -0.032                           |
| rs7255436                     | rs2278236  | 0.97           | G                            | 0.486   | A                      | -0.032                           |
| rs838880                      | rs838878   | 0.96           | A                            | 0.307   | G                      | 0.048                            |
| rs7241918                     | rs2156552  | 0.95           | A                            | 0.162   | T                      | -0.090                           |
| rs7134594                     | rs7298565  | 0.94           | A                            | 0.548   | G                      | -0.035                           |
| rs2013208                     | rs1062633  | 0.90           | T                            | 0.506   | C                      | 0.025                            |
| rs386000                      | rs103294   | 0.89           | T                            | 0.189   | C                      | 0.048                            |
| rs2652834                     | rs11071721 | 0.85           | T                            | 0.207   | C                      | -0.028                           |
| rs16942887                    | rs20549    | 0.79           | G                            | 0.173   | A                      | 0.083                            |
| rs2606736                     | rs347591   | 0.79           | G                            | 0.353   | T                      | 0.025                            |
| rs3741414                     | rs11172134 | 0.72           | A                            | 0.189   | T                      | 0.028                            |

|            |           |      |   |       |   |       |
|------------|-----------|------|---|-------|---|-------|
| rs970548   | rs1487562 | 0.69 | T | 0.193 | C | 0.026 |
| rs12145743 | rs928391  | 0.68 | C | 0.267 | T | 0.020 |
| rs964184   | rs2075290 | 0.63 | T | 0.921 | C | 0.106 |
| rs1532085  | rs4775041 | 0.57 | C | 0.282 | G | 0.107 |
| rs12801636 | rs3741378 | 0.56 | T | 0.122 | C | 0.024 |

---

\*The following literature SNPs were not analyzed since there were no proxies available: rs10019888, rs1047891, rs10808546, rs11246602, rs12328675, rs12748152, rs12967135, rs13107325, rs1515100, rs1689800, rs17173637, rs17695224, rs181362, rs1936800, rs2290547, rs2293889, rs2602836, rs2923084, rs2925979, rs3822072, rs4082919, rs4142995, rs4148008, rs4420638, rs4650994, rs4660293, rs4731702, rs4759375, rs4765127, rs4917014, rs4983559, rs499974, rs605066, rs643531, rs6450176, rs702485, rs7115089, rs7134375, rs7188861, rs731839, rs737337, rs78058190, rs998584, rs9987289.

**Table S14.** Ischemic stroke: SNPs for genetic risk score calculation\*

| <b>Literature SNP<sup>13</sup></b> | <b>Used SNP</b> | <b>R<sup>2</sup></b> | <b>Used SNP: Effect allele</b> | <b>EA freq</b> | <b>Used SNP: Other allele</b> | <b>OR for literature SNP</b> |
|------------------------------------|-----------------|----------------------|--------------------------------|----------------|-------------------------------|------------------------------|
| rs6843082                          | rs4611994       | 0.53                 | C                              | 0.125          | T                             | 1.36                         |
| rs2383207                          | rs944797        | 1.00                 | C                              | 0.546          | T                             | 1.15                         |
| rs505922                           | rs657152        | 1.00                 | A                              | 0.369          | C                             | 1.13                         |
| rs660599                           | rs17368659      | 0.55                 | T                              | 0.133          | G                             | 1.18                         |
| rs10744777                         | rs10744777      | 1.00                 | T                              | 0.668          | C                             | 1.10                         |

\*The following literature SNPs were not analyzed since there were no proxies available: rs556621, rs2107595, rs879324.

**Table S15.** Low-density lipoprotein (LDL): SNPs for genetic risk score calculation\*

| Literature SNP <sup>7,8</sup> | Used SNP  | R <sup>2</sup> | Used SNP: Effect allele (EA) | EA freq | Used SNP: Other allele | β-coefficient for literature SNP |
|-------------------------------|-----------|----------------|------------------------------|---------|------------------------|----------------------------------|
| rs10401969                    | rs3794991 | 1.00           | T                            | 0.0824  | C                      | -0.118                           |
| rs12027135                    | rs873308  | 1.00           | G                            | 0.460   | A                      | -0.030                           |
| rs12916                       | rs12916   | 1.00           | C                            | 0.397   | T                      | 0.073                            |
| rs1367117                     | rs1367117 | 1.00           | A                            | 0.318   | G                      | 0.119                            |
| rs174583                      | rs174576  | 1.00           | A                            | 0.333   | C                      | -0.051                           |
| rs2000999                     | rs2000999 | 1.00           | A                            | 0.210   | G                      | 0.065                            |
| rs2479409                     | rs2479409 | 1.00           | G                            | 0.345   | A                      | 0.064                            |
| rs4299376                     | rs4299376 | 1.00           | G                            | 0.320   | T                      | 0.081                            |
| rs629301                      | rs646776  | 1.00           | C                            | 0.227   | T                      | -0.167                           |
| rs649129                      | rs651007  | 1.00           | T                            | 0.229   | C                      | 0.077                            |
| rs3850634                     | rs1748197 | 0.97           | A                            | 0.322   | G                      | -0.049                           |
| rs964184                      | rs2075290 | 0.63           | T                            | 0.921   | C                      | -0.086                           |

\*The following literature SNPs were not analyzed since there were no proxies available: rs11065987, rs11136341, rs11153594, rs11220462, rs1129555, rs1169288, rs117492019, rs12670798, rs1564348, rs1800562, rs182616603, rs2081687, rs2126259, rs217386, rs247616, rs2807834, rs2902941, rs2954022, rs3177928, rs3757354, rs4420638, rs514230, rs6511720, rs6882076, rs7206971, rs79588679, rs8017377, rs909802.

**Table S16.** Systolic blood pressure (SBP): SNPs for genetic risk score calculation\*

| Literature SNP <sup>10</sup> | Used SNP   | R <sup>2</sup> | Used SNP: Effect allele (EA) | EA freq | Used SNP: Other allele | $\beta$ -coefficient for literature SNP |
|------------------------------|------------|----------------|------------------------------|---------|------------------------|-----------------------------------------|
| rs10224002                   | rs10224002 | 1.00           | A                            | 0.702   | G                      | -0.465                                  |
| rs11105354                   | rs11105354 | 1.00           | A                            | 0.829   | G                      | 0.909                                   |
| rs11229457                   | rs11229519 | 0.74           | T                            | 0.231   | C                      | -0.310                                  |
| rs12247028                   | rs7080350  | 0.56           | A                            | 0.600   | G                      | -0.364                                  |
| rs1450271                    | rs7944706  | 0.76           | A                            | 0.455   | G                      | 0.413                                   |
| rs1620668                    | rs1620668  | 1.00           | A                            | 0.841   | G                      | -0.535                                  |
| rs17367504                   | rs17367504 | 1.00           | A                            | 0.855   | G                      | 0.716                                   |
| rs217727                     | rs217727   | 1.00           | A                            | 0.196   | G                      | 0.591                                   |
| rs2493134                    | rs2493134  | 1.00           | T                            | 0.572   | C                      | -0.431                                  |
| rs3184504                    | rs3184504  | 1.00           | T                            | 0.489   | C                      | 0.498                                   |
| rs347591                     | rs347591   | 1.00           | T                            | 0.647   | G                      | 0.244                                   |
| rs3741378                    | rs3741378  | 1.00           | T                            | 0.122   | C                      | -0.486                                  |
| rs5219                       | rs5215     | 0.94           | T                            | 0.638   | C                      | 0.320                                   |
| rs592373                     | rs592373   | 1.00           | A                            | 0.640   | G                      | 0.484                                   |
| rs6271                       | rs6271     | 1.00           | T                            | 0.0668  | C                      | -0.591                                  |
| rs7129220                    | rs4403799  | 0.92           | A                            | 0.883   | G                      | -1.107                                  |
| rs7297416                    | rs7297416  | 1.00           | A                            | 0.707   | C                      | 0.090                                   |
| rs757081                     | rs5215     | 0.65           | T                            | 0.638   | C                      | -0.085                                  |
| rs936226                     | rs7085     | 0.85           | T                            | 0.292   | C                      | -0.549                                  |

\*The following literature SNPs were not analyzed since there were no proxies available: rs10077885, rs10760117, rs111245230, rs11128722, rs11556924a, rs1156725, rs11639856, rs1173766, rs11953630, rs12243859, rs12279202, rs12627651, rs12656497, rs12705390, rs12940887, rs12940887, rs12946454, rs12958173, rs13107325, rs1327235, rs13359291, rs1361831, rs1371182, rs1378942, rs1458038, rs16849225, rs16877320, rs17010957, rs17037390, rs17080093, rs17365948, rs17428471, rs17608766, rs17638167, rs1799945, rs1813353, rs1975487, rs2014912, rs2270860, rs2291435, rs2493292, rs2521501, rs2586886, rs2594992, rs2891546, rs2898290, rs2932538, rs2969070, rs35479618,

rs35529250, rs3735533, rs3752728, rs381815, rs4245739, rs4247374, rs4387287, rs4590817,  
rs4691707, rs4823006, rs6026748, rs61760904, rs633185, rs6442101, rs6722745, rs6779380, rs689134,  
rs6919440, rs7076398, rs7103648, rs711737, rs7213273, rs740746, rs7515635, rs751984, rs805303,  
rs880315, rs932764, rs9349379, rs943037.

**Table S17.** Systemic lupus erythematosus (SLE): SNPs for genetic risk score calculation\*

| Literature SNP <sup>14</sup> | Used SNP   | R <sup>2</sup> | Used SNP: Effect allele (EA) | EA freq | Used SNP: Other allele | OR for literature SNP |
|------------------------------|------------|----------------|------------------------------|---------|------------------------|-----------------------|
| rs10036748                   | rs7708392  | 1.00           | C                            | 0.258   | G                      | 1.33                  |
| rs10488631                   | rs10488631 | 1.00           | C                            | 0.105   | T                      | 1.84                  |
| rs2286672                    | rs2286672  | 1.00           | T                            | 0.0760  | C                      | 1.24                  |
| rs2476601                    | rs2476601  | 1.00           | A                            | 0.0862  | G                      | 1.37                  |
| rs3794060                    | rs7928249  | 1.00           | A                            | 0.261   | G                      | 1.12                  |
| rs9652601                    | rs2041670  | 0.96           | G                            | 0.667   | A                      | 1.13                  |
| rs10774625                   | rs3184504  | 0.93           | T                            | 0.489   | C                      | 1.17                  |
| rs6932056                    | rs2230926  | 0.79           | G                            | 0.0350  | T                      | 1.70                  |
| rs34572943                   | rs13338069 | 0.69           | G                            | 0.127   | A                      | 1.69                  |

\*The following literature SNPs were not analyzed since there were no proxies available: rs10028805, rs1059312, rs11644034, rs11889341, rs1270942, rs12802200, rs1734787, rs17849501, rs1801274, rs2111485, rs2289583, rs2304256, rs2431697, rs2663052, rs2732549, rs2736340, rs2941509, rs3024505, rs3768792, rs4902562, rs4917014, rs4948496, rs564799, rs6568431, rs6740462, rs704840, rs7444, rs7726414, rs7941765, rs849142, rs887369, rs9311676, rs9462027, rs9782955.

**Table S18.** Type 2 diabetes mellitus (T2DM): SNPs for genetic risk score calculation\*

| Literature SNP <sup>15</sup> | Used SNP   | R <sup>2</sup> | Used SNP: Effect allele (EA) | EA freq | Used SNP: Other allele | OR for literature SNP |
|------------------------------|------------|----------------|------------------------------|---------|------------------------|-----------------------|
| rs6757251                    | rs7578597  | 1.00           | C                            | 0.104   | T                      | 1.14                  |
| rs4402960                    | rs4402960  | 1.00           | T                            | 0.326   | G                      | 1.15                  |
| rs3821943                    | rs3821943  | 1.00           | T                            | 0.539   | C                      | 1.10                  |
| rs1635852                    | rs864745   | 0.97           | T                            | 0.501   | C                      | 1.10                  |
| rs878521                     | rs2908282  | 0.55           | A                            | 0.175   | G                      | 1.05                  |
| rs3802177                    | rs3802177  | 1.00           | G                            | 0.700   | A                      | 1.12                  |
| rs10757282                   | rs10757282 | 1.00           | C                            | 0.444   | T                      | 1.04                  |
| rs635634                     | rs651007   | 1.00           | T                            | 0.229   | C                      | 1.08                  |
| rs7903146                    | rs7903146  | 1.00           | T                            | 0.302   | C                      | 1.34                  |
| rs233449                     | rs233449   | 1.00           | G                            | 0.718   | A                      | 1.09                  |
| rs5219                       | rs5215     | 0.94           | T                            | 0.638   | C                      | 1.07                  |
| rs76550717                   | rs613937   | 0.79           | A                            | 0.830   | G                      | 1.10                  |
| rs10830963                   | rs10830963 | 1.00           | G                            | 0.276   | C                      | 1.08                  |
| rs6581998                    | rs4760921  | 0.70           | T                            | 0.329   | A                      | 1.06                  |
| rs56348580                   | rs12427353 | 0.66           | G                            | 0.802   | C                      | 1.08                  |
| rs78761021                   | rs7219033  | 0.87           | G                            | 0.700   | A                      | 1.07                  |
| rs757209                     | rs4239217  | 0.63           | G                            | 0.393   | A                      | 1.09                  |
| rs12454712                   | rs12454712 | 1.00           | T                            | 0.626   | C                      | 1.05                  |
| rs58489806                   | rs3794991  | 0.64           | T                            | 0.0824  | C                      | 1.09                  |
| rs12625671                   | rs4810426  | 0.87           | C                            | 0.872   | T                      | 1.09                  |
| rs1800961                    | rs1800961  | 1.00           | T                            | 0.0284  | C                      | 1.17                  |

\*The following literature SNPs were not analyzed since there were no proxies available: rs3768321, rs12031920, rs406767, rs67156297, rs340874, rs145819220, rs9309245, rs1116357, rs10193447, rs6723108, rs7560163, rs1563575, rs28584669, rs2972156, rs1861612, rs11712037, rs35352848, rs79819696, rs7428936, rs11708067, rs9820223, rs6777684, rs1531583, rs7660590, rs60780116,

rs11747901, rs9687833, rs173964, rs6453287, rs78408340, rs74944275, rs6923241, rs7451008, rs115321690, rs2244020, rs9271774, rs143308245, rs139514607, rs11759026, rs6918311, rs10276674, rs10238625, rs10229583, rs73455744, rs791595, rs10954284, rs1182436, rs516946, rs4734285, rs11786613, rs10758593, rs186838848, rs10965248, rs10965223, rs1575972, rs13301067, rs9410573, rs11787792, rs11257659, rs10998572, rs810517, rs11187140, rs10886471, rs2292626, rs2334499, rs11564732, rs7107784, rs756852, rs231360, rs2237897, rs191294997, rs441613, rs1061810, rs111669836, rs11063018, rs188827514, rs4238013, rs7953190, rs147538848, rs2258238, rs2851437, rs9552911, rs7330796, rs11616380, rs10146997, rs7403531, rs67839313, rs4774420, rs952471, rs62006309, rs62023387, rs12595616, rs1558902, rs8056814, rs2925979, rs9911305, rs7224685, rs13342692, rs79349575, rs7234111, rs1942880, rs79851087, rs139990642, rs429358, rs55864746, rs2023681, rs5945326.

**Table S19.** Triglycerides: SNPs for genetic risk score calculation\*

| Literature SNP <sup>7,8</sup> | Used SNP   | R <sup>2</sup> | Used SNP: Effect allele (EA) | EA freq | Used SNP: Other allele | β-coefficient for literature SNP |
|-------------------------------|------------|----------------|------------------------------|---------|------------------------|----------------------------------|
| rs10401969                    | rs3794991  | 1.00           | T                            | 0.0824  | C                      | -0.121                           |
| rs1260326                     | rs1260326  | 1.00           | T                            | 0.428   | C                      | 0.115                            |
| rs12678919                    | rs10503669 | 1.00           | A                            | 0.0996  | C                      | -0.170                           |
| rs1321257                     | rs2281719  | 1.00           | C                            | 0.400   | T                      | 0.040                            |
| rs174546                      | rs1535     | 1.00           | G                            | 0.326   | A                      | 0.045                            |
| rs2131925                     | rs1748197  | 1.00           | A                            | 0.322   | G                      | -0.066                           |
| rs2954029                     | rs10808546 | 1.00           | T                            | 0.425   | C                      | -0.076                           |
| rs4810479                     | rs4810479  | 1.00           | C                            | 0.256   | T                      | 0.053                            |
| rs7248104                     | rs7508679  | 1.00           | T                            | 0.430   | C                      | -0.022                           |
| rs2068888                     | rs4418728  | 0.97           | T                            | 0.458   | G                      | -0.024                           |
| rs442177                      | rs3775214  | 0.93           | G                            | 0.388   | A                      | -0.031                           |
| rs11613352                    | rs11172134 | 0.77           | A                            | 0.189   | T                      | -0.028                           |
| rs5756931                     | rs4820314  | 0.66           | A                            | 0.352   | G                      | -0.020                           |
| rs964184                      | rs2075290  | 0.63           | T                            | 0.921   | C                      | -0.234                           |
| rs11649653                    | rs749767   | 0.62           | G                            | 0.373   | A                      | -0.027                           |

\*The following literature SNPs were not analyzed since there were no proxies available: rs10761731, rs11776767, rs12310367, rs13238203, rs1495743, rs1553318, rs1832007, rs193042029, rs2255811, rs2412710, rs2540948, rs261342, rs2929282, rs2943645, rs3198697, rs340839, rs38855, rs645040, rs6831256, rs7205804, rs731839, rs7811265, rs8077889, rs9686661, rs998584.

**Table S20.** Uric acid: SNPs for genetic risk score calculation\*

| Literature SNP <sup>16</sup> | Used SNP   | R <sup>2</sup> | Used SNP: Effect allele (EA) | EA freq | Used SNP: Other allele | $\beta$ -coefficient for literature SNP |
|------------------------------|------------|----------------|------------------------------|---------|------------------------|-----------------------------------------|
| rs1260326                    | rs1260326  | 1.00           | T                            | 0.428   | C                      | 0.074                                   |
| rs2231142                    | rs2231142  | 1.00           | T                            | 0.101   | G                      | 0.217                                   |
| rs1178977                    | rs17145713 | 1.00           | C                            | 0.812   | T                      | 0.047                                   |
| rs10480300                   | rs10480300 | 1.00           | T                            | 0.288   | C                      | 0.035                                   |
| rs6598541                    | rs4966021  | 0.96           | C                            | 0.372   | T                      | 0.043                                   |
| rs17786744                   | rs3758086  | 0.90           | G                            | 0.595   | A                      | -0.029                                  |
| rs653178                     | rs3184504  | 0.87           | C                            | 0.511   | T                      | -0.035                                  |
| rs7193778                    | rs33063    | 0.85           | G                            | 0.856   | A                      | -0.046                                  |
| rs729761                     | rs9369425  | 0.75           | G                            | 0.295   | A                      | -0.047                                  |
| rs3741414                    | rs11172134 | 0.72           | A                            | 0.189   | T                      | -0.072                                  |
| rs11264341                   | rs4072037  | 0.55           | C                            | 0.460   | T                      | -0.050                                  |

\*The following literature SNPs were not analyzed since there were no proxies available: rs1471633, rs12498742, rs675209, rs1165151, rs1171614, rs2078267, rs478607, rs17050272, rs2307394, rs6770152, rs17632159, rs2941484, rs10821905, rs642803, rs1394125, rs7188445, rs7224610, rs2079742, rs164009.

**Table S21.** Venous thromboembolism (VTE): SNPs for genetic risk score calculation\*

| <b>Literature SNP <sup>17</sup></b> | <b>Used SNP</b> | <b>R<sup>2</sup></b> | <b>Used SNP: Effect allele (EA)</b> | <b>EA freq</b> | <b>Used SNP: Other allele</b> | <b>OR for literature SNP</b> |
|-------------------------------------|-----------------|----------------------|-------------------------------------|----------------|-------------------------------|------------------------------|
| rs6025                              | rs6025          | 1.00                 | T                                   | 0.0262         | C                             | 3.25                         |
| rs4524                              | rs4524          | 1.00                 | T                                   | 0.740          | C                             | 1.20                         |
| rs2066865                           | rs2066861       | 1.00                 | T                                   | 0.231          | C                             | 1.24                         |
| rs529565                            | rs657152        | 1.00                 | A                                   | 0.369          | C                             | 1.55                         |
| rs4253417                           | rs3756009       | 0.80                 | G                                   | 0.394          | A                             | 1.27                         |

\*The following literature SNPs were not analyzed since there were no proxies available: rs1799963, rs6087685, rs4602861, rs78707713, rs2288904.

### Supplemental references noted in Tables S1-S21.

1. Tyrrell J, Richmond RC, Palmer TM, Feenstra B, Rangarajan J, Metrustry S, et al. Genetic Evidence for Causal Relationships Between Maternal Obesity-Related Traits and Birth Weight. *JAMA*. 2016 Mar 15;315(11):1129–40.
2. Chambers JC, Zhang W, Sehmi J, Li X, Wass MN, Van der Harst P, et al. Genome-wide association study identifies loci influencing concentrations of liver enzymes in plasma. *Nat Genet*. 2011 Nov;43(11):1131–8.
3. Horikoshi M, Beaumont RN, Day FR, Warrington NM, Kooijman MN, Fernandez-Tajes J, et al. Genome-wide associations for birth weight and correlations with adult disease. *Nature*. 2016 Sep 28;538(7624):248–52.
4. Locke AE, Kahali B, Berndt SI, Justice AE, Pers TH, Day FR, et al. Genetic studies of body mass index yield new insights for obesity biology. *Nature*. 2015 Feb 12;518(7538):197–206.
5. Nikpay M, Goel A, Won H-H, Hall LM, Willenborg C, Kanoni S, et al. A comprehensive 1,000 Genomes-based genome-wide association meta-analysis of coronary artery disease. *Nat Genet*. 2015 Oct;47(10):1121–30.
6. Verweij N, Eppinga RN, Hagemeyer Y, van der Harst P. Identification of 15 novel risk loci for coronary artery disease and genetic risk of recurrent events, atrial fibrillation and heart failure. *Sci Rep*. 2017 Jun 5;7(1):2761.
7. Willer CJ, Schmidt EM, Sengupta S, Peloso GM, Gustafsson S, Kanoni S, et al. Discovery and refinement of loci associated with lipid levels. *Nat Genet*. 2013 Nov;45(11):1274–83.
8. Surakka I, Horikoshi M, Mägi R, Sarin A-P, Mahajan A, Lagou V, et al. The impact of low-frequency and rare variants on lipid levels. *Nat Genet*. 2015 Jun;47(6):589–97.
9. Dehghan A, Dupuis J, Barbalic M, Bis JC, Eiriksdottir G, Lu C, et al. Meta-analysis of genome-wide association studies in >80 000 subjects identifies multiple loci for C-reactive protein levels. *Circulation*. 2011 Feb 22;123(7):731–8.
10. Ehret GB, Ferreira T, Chasman DI, Jackson AU, Schmidt EM, Johnson T, et al. The genetics of blood pressure regulation and its target organs from association studies in 342,415 individuals. *Nat Genet*. 2016 Oct;48(10):1171–1184.
11. Pattaro C, Teumer A, Gorski M, Chu AY, Li M, Mijatovic V, et al. Genetic associations at 53 loci highlight cell types and biological pathways relevant for kidney function. *Nat Commun*. 2016 Jan 21;7:10023.
12. de Vries PS, Chasman DI, Sabater-Lleal M, Chen M-H, Huffman JE, Steri M, et al. A meta-analysis of 120 246 individuals identifies 18 new loci for fibrinogen concentration. *Hum Mol Genet*. 2016 Jan 15;25(2):358–70.
13. Neurology Working Group of the Cohorts for Heart and Aging Research in Genomic Epidemiology (CHARGE) Consortium, the Stroke Genetics Network (SiGN), and the International Stroke Genetics Consortium (ISGC). Identification of additional risk loci for stroke and small vessel disease: a meta-analysis of genome-wide association studies. *Lancet Neurol*. 2016 Jun;15(7):695–707.
14. Bentham J, Morris DL, Cunninghame Graham DS, Pinder CL, Tomblason P, Behrens TW, et al. Genetic association analyses implicate aberrant regulation of innate and adaptive immunity genes in the pathogenesis of systemic lupus erythematosus. *Nat Genet*. 2015 Dec;47(12):1457–64.

15. Scott RA, Scott LJ, Mägi R, Marullo L, Gaulton KJ, Kaakinen M, et al. An Expanded Genome-Wide Association Study of Type 2 Diabetes in Europeans. *Diabetes*. 2017 Nov;66(11):2888–902.
16. Köttgen A, Albrecht E, Teumer A, Vitart V, Krumsiek J, Hundertmark C, et al. Genome-wide association analyses identify 18 new loci associated with serum urate concentrations. *Nat Genet*. 2013 Feb;45(2):145–54.
17. Germain M, Chasman DI, de Haan H, Tang W, Lindström S, Weng L-C, et al. Meta-analysis of 65,734 individuals identifies TSPAN15 and SLC44A2 as two susceptibility loci for venous thromboembolism. *Am J Hum Genet*. 2015 Apr 2;96(4):532–42.
